# Supplementary material for: Enhanced thermoelectric performance of hot-pressed n-type Ag2Se nanostructures by controlling the intrinsic lattice defects
Source: Royal Society of Chemistry journal article supplement (doi:10.1039/d3ce00066d), 2023-01-01
Supplement: d3ce00066d1.pdf [file d3ce00066d1.pdf]

## **Enhanced Thermoelectric Performance of hot-pressed n-type Ag<sub>2</sub>Se nanostructures via controlling the intrinsic lattice defects**

R. Santhosh<sup>a</sup>, S. Harish<sup>a,b</sup>, R. Abinaya<sup>a</sup>, S. Ponnusamy<sup>a\*</sup>, H. Ikeda<sup>b</sup>,

J. Archana<sup>a</sup>, M. Navaneethan<sup>a,c</sup>

<sup>a</sup>Functional materials and Energy devices Laboratory, Department of Physics and Nanotechnology, SRM IST, Kattankulathur, Chennai, 603203, Tamil Nadu, India

<sup>b</sup>Graduate School of Science and Technology, Shizuoka University, 3-5-1 Johoku, Naka-Ku, Hamamatsu, Shizuoka 432-8011, Japan

<sup>c</sup>Nanotechnology Research Center, Faculty of Engineering and Technology, SRM Institute of Science and Technology, Kattankulathur, Chennai 603203, Tamil Nadu, India

### **\*Corresponding authors**

**Dr. M. Navaneethan**

E-mail: [m.navaneethan@gmail.com](mailto:m.navaneethan@gmail.com)

**Dr. S. Ponnusamy**

E-mail: [suruponnus@gmail.com](mailto:suruponnus@gmail.com)

**Figure captions:**

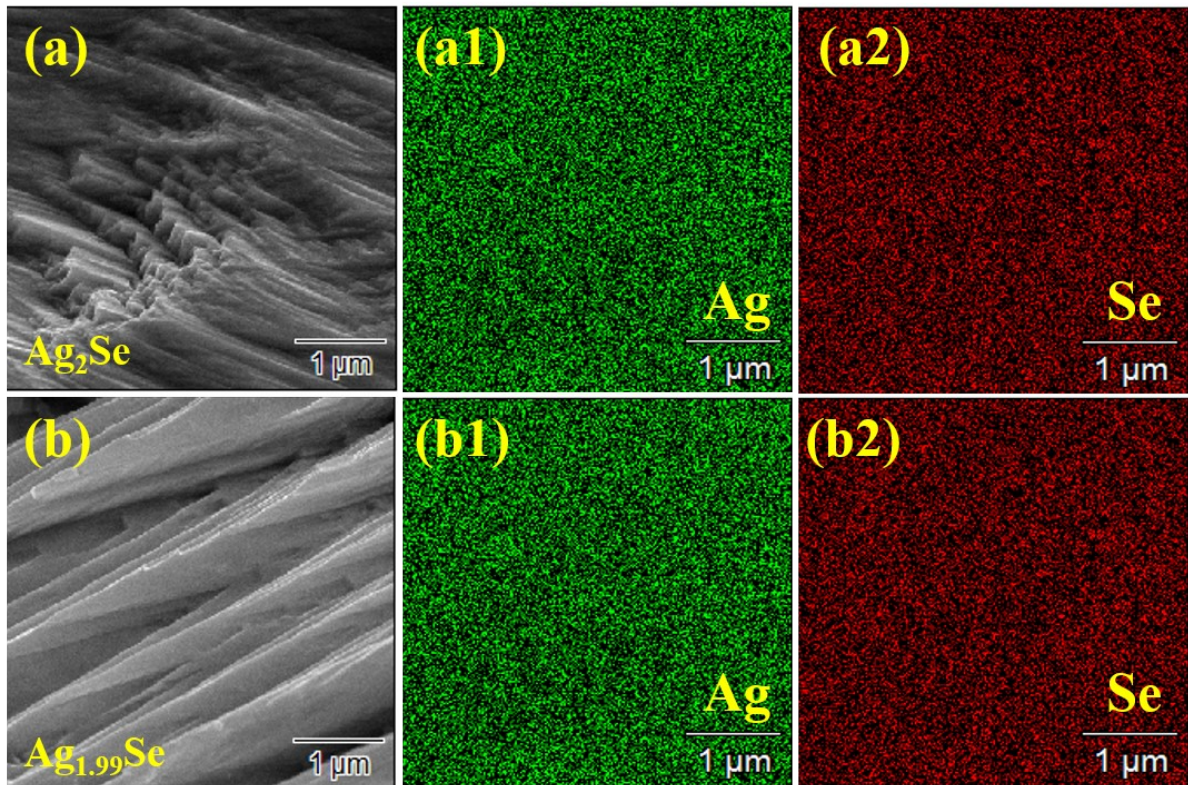

**Figure.1.** FESEM Mapping images of pristine  $\text{Ag}_2\text{Se}$  and  $\text{Ag}_{1.99}\text{Se}$ .

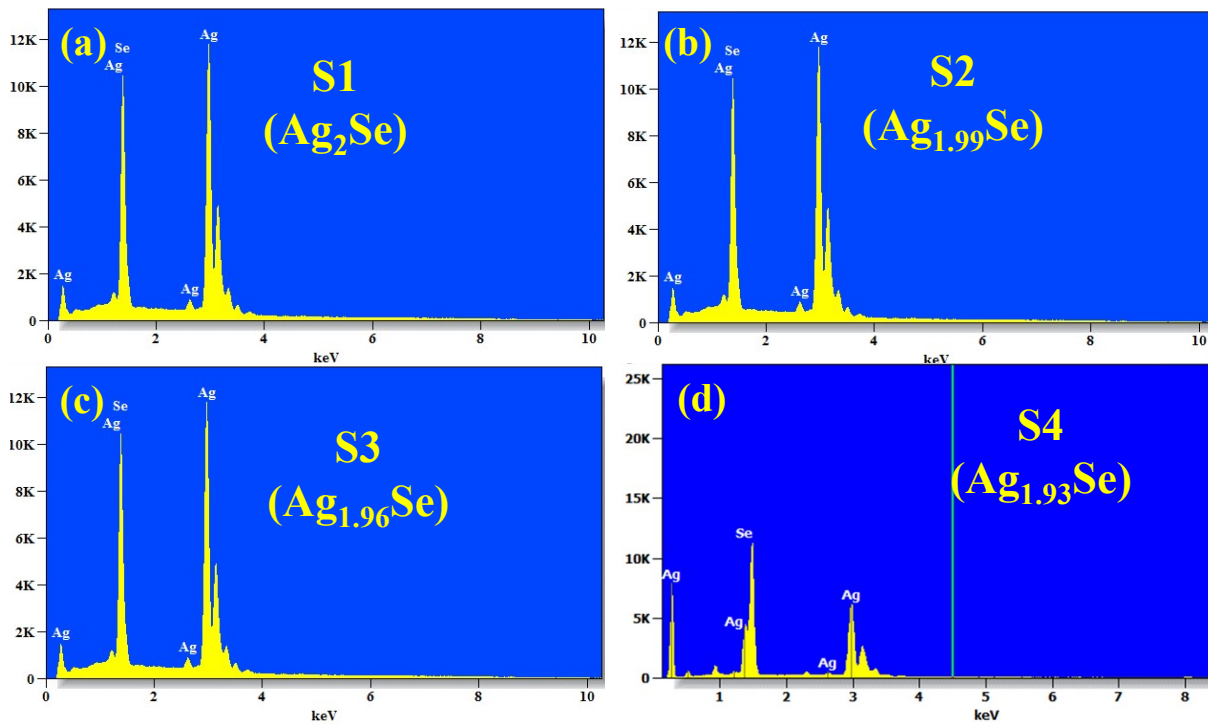

**Figure.2.** EDS spectra of pristine  $\text{Ag}_2\text{Se}$ ,  $\text{Ag}_{1.99}\text{Se}$ ,  $\text{Ag}_{1.96}\text{Se}$  and  $\text{Ag}_{1.93}\text{Se}$  samples.

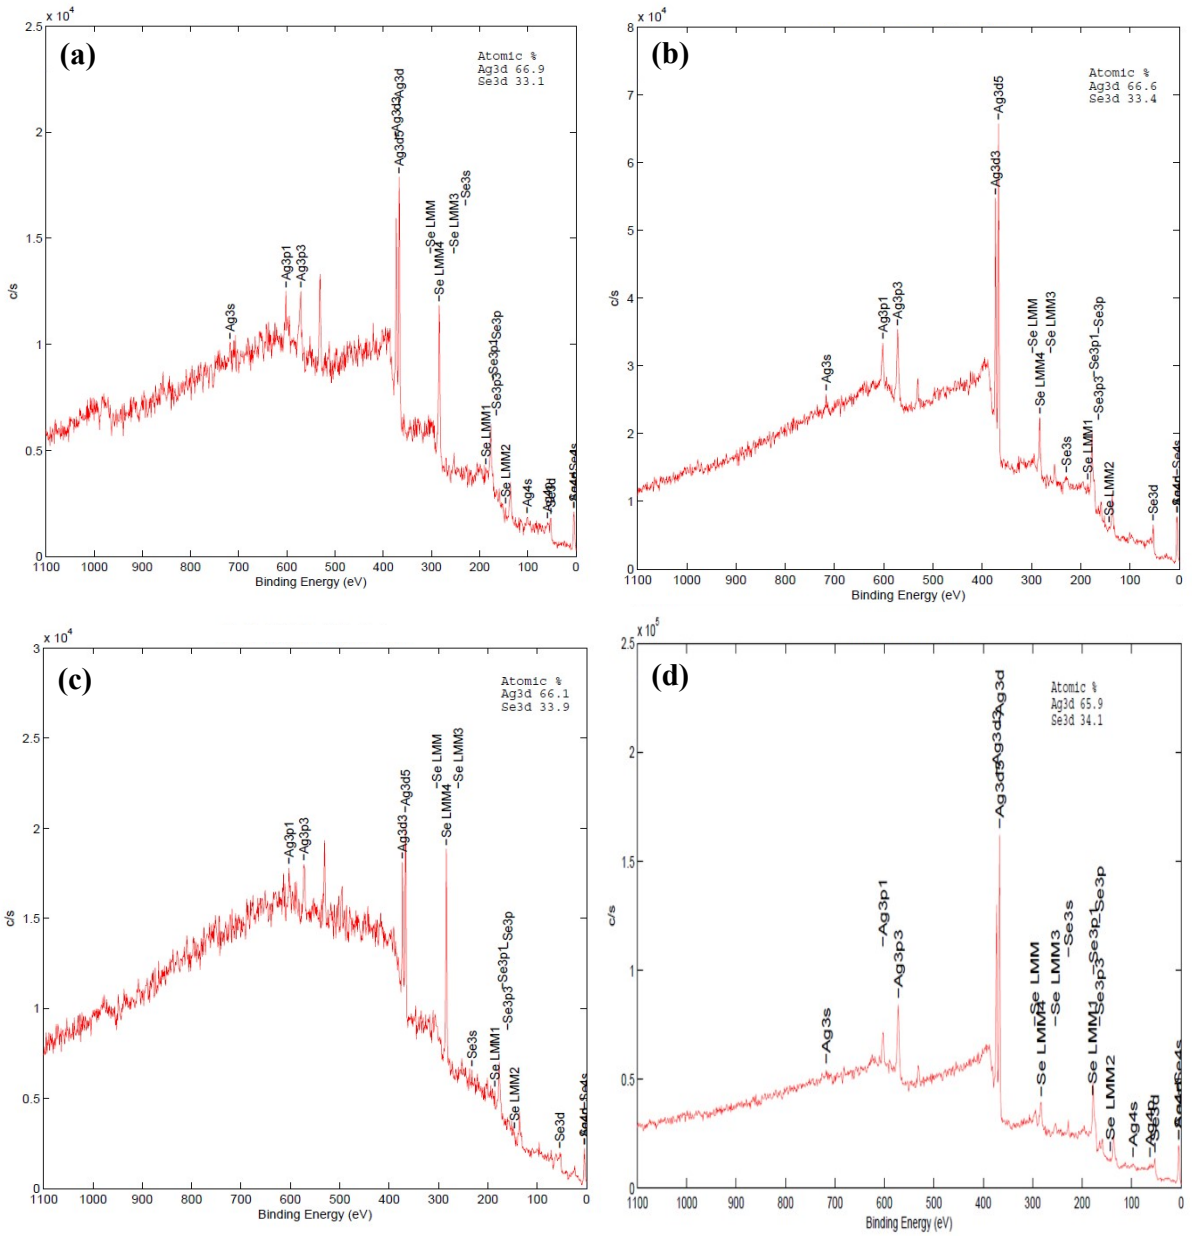

**Figure.3.** Survey spectrum Ag<sub>2</sub>Se (S1), Ag<sub>1.99</sub>Se (S1), Ag<sub>1.96</sub>Se (S1) and Ag<sub>1.93</sub>Se (S1) nanostructures

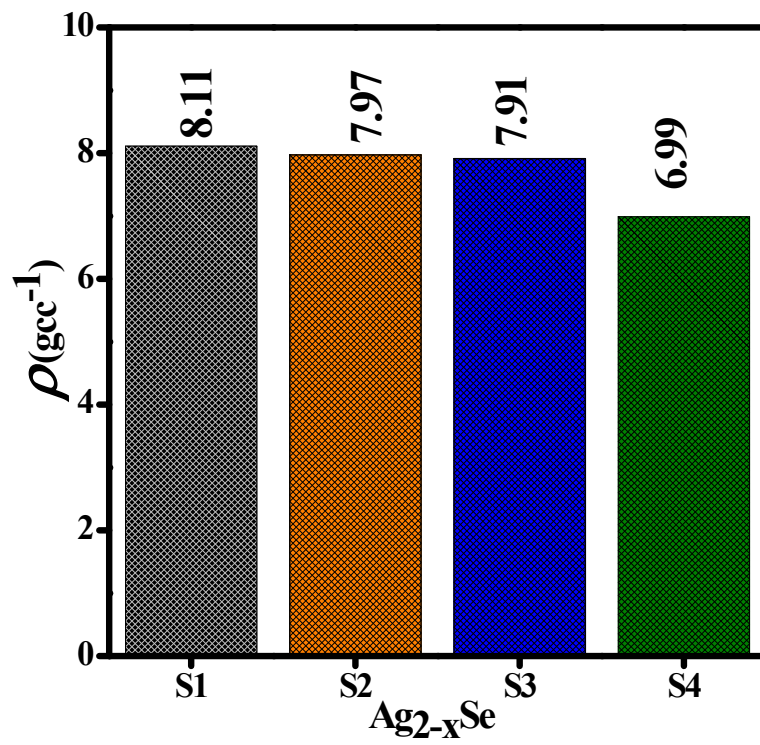

**Figure.4.** Schematic representation of Ag<sub>2-x</sub>Se nanostructures
